# Supplementary material for: “A Good Death But There Was All This Tension Around” - Perspectives of Residential Managers on the Experiences and Challenges of Delivering end of Life Care for People Living with Dementia.
Source: Research Square preprint supplement (doi:10.21203/rs.3.rs-94538/v1), 2020-10-22
Supplement: Supplementary file 1 [file ac6ee79da1c996e2e7818606.docx]

**Appendix One - Focus Group and Interview Discussion Guide**

***Introductions and icebreaker:***

To begin, let’s go around and please say your first name, and the first thing that comes to mind when I say the phrase – end of life care?

***Personal Experience in providing end of life care***

1. Can you describe your role in providing care for residents with advanced dementia who are approaching the end of life or dying?

*Probes:*

- 1. Can you describe your role as in supporting the family/close friends of people with advanced dementia at the end of life? (in the period leading up to, during and after death)
  2. How does your role as compare to the role of other team members in proving end of life care?
  3. How confident do you feel in providing end of life care for people with advanced dementia? Why?
  4. How confident do you feel in supporting the person’s family/close friends during this period? (leading up to, during and after death) Why?
  5. Are there things that you find rewarding about providing end of life care for people with advanced dementia and supporting the family?
     - 1. If so what?
       2. Why?
       3. Can you provide an example of a time you found this aspect of care rewarding?
  6. Are there things that you find challenging about providing end of life care for people with advanced dementia and supporting the family?
     - 1. If so what?
       2. Why?
       3. Is there a specific example that you’d be comfortable to share?

***Current provision of end of life care at this facility/care home/cottage***

1. Generally speaking, how would you describe the quality of end of life care provided by your [care home/facility/cottage] for people with advanced dementia?
2. Are there aspects of end of life care do you think are done well in your [care home/facility/cottage]?

If so what? Why?

Can you give an example of a resident who you feel received really good quality end of life care? What was it that made the care good quality in this case?

1. Are there aspects that are NOT working well in providing end of life care in your [care home/facility/cottage]?
   - - - 1. If so what? Why?
         2. Can you give an example of a time when things didn’t go well at the end of life for one of the residents at this [care home/facility/cottage]? What was it that made things challenging in this case? Were there difficulties accessing any particular aspects of care and if so what were these difficulties?
2. Considering what we have discussed so far, are there any ethical challenges in providing end of life care at your (facility/cottage/care home)? If so, what are these?

***Important components of quality end of life Care***

1. What does excellent end of life care look like to you for people with advanced dementia in residential aged care?
2. What are the most important things needed to provide excellent end of life care for people with advanced dementia?
   1. Why?
   2. What is needed to achieve that (if suggestions too vague)
3. Are there barriers to providing these things in your [care home/facility/cottage]? Is so what are these barriers? How could these barriers be overcome?

***How to enable delivery of quality end of life Care***

1. What changes are needed to improve end of life care for residents with dementia at your facility? What changes are needed to improve end of life care within HammondCare’s residential aged care services more generally?
2. If you had the opportunity to tell the government how you could improve end of life care for people with advanced dementia living in residential aged care, what would you be asking for?
3. *(Do you have any other suggestions for improvement? Are there any supports, training, resources, or policies that you feel are lacking?)*
4. Is there anything else that you think might be important or relevant to add?
